# Supplementary material
Source: publisher site journal article supplement (https://www.dovepress.com/article/390125)
Supplement: Supplementary file 1 [file get_supplementary_file.php]

Appendix 1: Questionnaire for O5G Allergy

1. General information: Please complete the following:

Age ……… years

Sex M F

I have: ☐ asthma

☐ other food allergies

☐ hayfever

☐ eczema

2. Reactions and Diagnosis

How long ago were you diagnosed with Omega-5-gliadin allergy? …………..months

………………years

How long did you have symptoms before the diagnosis was made? ………months

…………………yrs

How many reactions do you think you had before the diagnosis was made?.............

How many reactions have you had since the diagnosis was made? …………..

3. Regarding diet:

Choose one that best describes what your doctor advised:

☐ Avoid wheat all the time

☐ Avoid wheat most of the time

☐ Avoid wheat about half the time

☐ Avoid wheat occasionally

☐ Avoid gluten all the time

(This means a “coeliac” diet: ie. no wheat, rye, barley, oats)

☐ Avoid gluten most of the time

☐ Avoid gluten about half the time

☐ Avoid gluten occasionally

☐ No need to avoid any foods

Choose one that best describes your diet now:

☐ I avoid wheat all the time

☐ I avoid wheat most of the time

☐ I avoid wheat about half the time

☐ I avoid wheat occasionally

☐ I avoid gluten all the time

(This means a “coeliac” diet: ie. no wheat, rye, barley, oats)

☐ I avoid gluten most of the time

☐ I avoid gluten about half the time

☐ I avoid gluten occasionally

☐ I do not avoid any foods

Y/N Have you ever seen a dietician regarding your Omega-5-gliadin allergy?

4. Exercise:

Choose one that best describes what your doctor advised:

☐ Only exercise on an empty stomach (4 hours without eating)

☐ Limit exercise after eating wheat or gluten (within 4 hours)

☐ Exercise at any time

☐ Avoid all exercise because of the Omega-5-gliadin allergy

☐ Avoid all exercise for other reasons

Choose one that best describes what you do now:

☐ I only exercise on an empty stomach (4 hours without eating)

☐ I limit exercise after eating wheat or gluten (within 4 hours)

☐ I exercise at any time

☐ I do not do any exercise because of the Omega-5-gliadin allergy

☐ I do not do any exercise for other reasons

5. Reactions since diagnosis

What do you think were relevant factors in any reactions that have occurred since you have known about the diagnosis? You may choose more than one:

☐ I decided to eat wheat / gluten

☐ I accidentally ate wheat / gluten

☐ I had unexpected exercise or exertion

☐ Travel / restaurant / take-away / unfamiliar situation

☐ I have another medical reason for these reactions

☐ I don’t know what happened

☐ I have not had any reactions since the diagnosis

6. Action plan and Severity:

Have you ever had Anaphylaxis? Y/N

(This is a severe generalised allergic reaction with dangerous features like collapse, fainting, or serious breathlessness. It may often be treated with Adrenaline injection)

Y/N Have you been prescribed an Epipen or Anapen?

Y/N I have a written action plan for my allergy

Y/N I am a member of the ambulance service

Please make note of any other comments, responses or details regarding this questionnaire.

Appendix 2: Questionnaire for Peanut Allergy

1. General information: Please complete the following:

Age ……… years

Sex M F

I have: ☐ asthma

☐ more than one food allergy

☐ hayfever

☐ eczema

Food(s) I am Allergic to: …………………………………………………………..

2. Reactions and Diagnosis

How long ago were you diagnosed with a food allergy? …………..months

………………years

How long did you have symptoms before the diagnosis was made? ………months

…………………yrs

How many reactions do you think you had before the diagnosis was made?.............

How many reactions have you had since the diagnosis was made? …………..

3. Regarding diet:

Choose one that best describes what your doctor advised:

☐ Avoid the food all the time

☐ Avoid it most of the time

☐ Avoid it about half the time

☐ Avoid it occasionally

☐ No need to avoid any foods

Choose one that best describes your diet now:

☐ I avoid the food all the time

☐ I avoid it most of the time

☐ I avoid it about half the time

☐ I avoid it occasionally

☐ I do not avoid any foods

Y/N Have you ever seen a dietitian regarding your food allergy?

4. Exercise: In certain cases people with food allergy are advised to change their exercise patterns

Choose one that best describes what your doctor advised:

☐ May exercise at any time

☐ Only exercise on an empty stomach (4 hours without eating)

☐ Limit exercise after eating the food allergen (within 4 hours)

☐ Avoid all exercise because of the food allergy

☐ Avoid all exercise for other reasons

☐ No specific advice given regarding exercise

Choose one that best describes what you do now:

☐ May exercise at any time

☐ Only exercise on an empty stomach (4 hours without eating)

☐ Limit exercise after eating the food allergen (within 4 hours)

☐ Avoid all exercise because of the food allergy

☐ Avoid all exercise for other reasons

☐ No specific advice given regarding exercise

5. Reactions since diagnosis

What do you think were relevant factors in any reactions that have occurred since you have known about the diagnosis? You may choose more than one:

☐ I decided to eat the food

☐ I accidentally ate it

☐ I had unexpected exercise or exertion

☐ Travel / restaurant / take-away / unfamiliar situation

☐ I have another medical reason for these reactions

☐ I don’t know what happened

☐ I have not had any reactions since the diagnosis

6. Action plan and Severity:

Have you ever had Anaphylaxis? Y/N

(This is a severe generalised allergic reaction with dangerous features like collapse, fainting, or serious breathlessness. It may often be treated with Adrenaline injection)

Y/N Have you been prescribed an Epipen or Anapen?

Y/N I have a written action plan for my allergy

Y/N I am a member of the ambulance service

Please make note of any other comments, responses or details regarding this questionnaire.
